# Supplementary material for: On understanding mountainous carbonate basins of the Mediterranean using parsimonious modeling solutions
Source: Copernicus journal article supplement (doi:10.5194/hess-27-4485-2023), 2023-12-20
Supplement: Supplementary file 1 [file hess-27-4485-2023-supplement.zip]

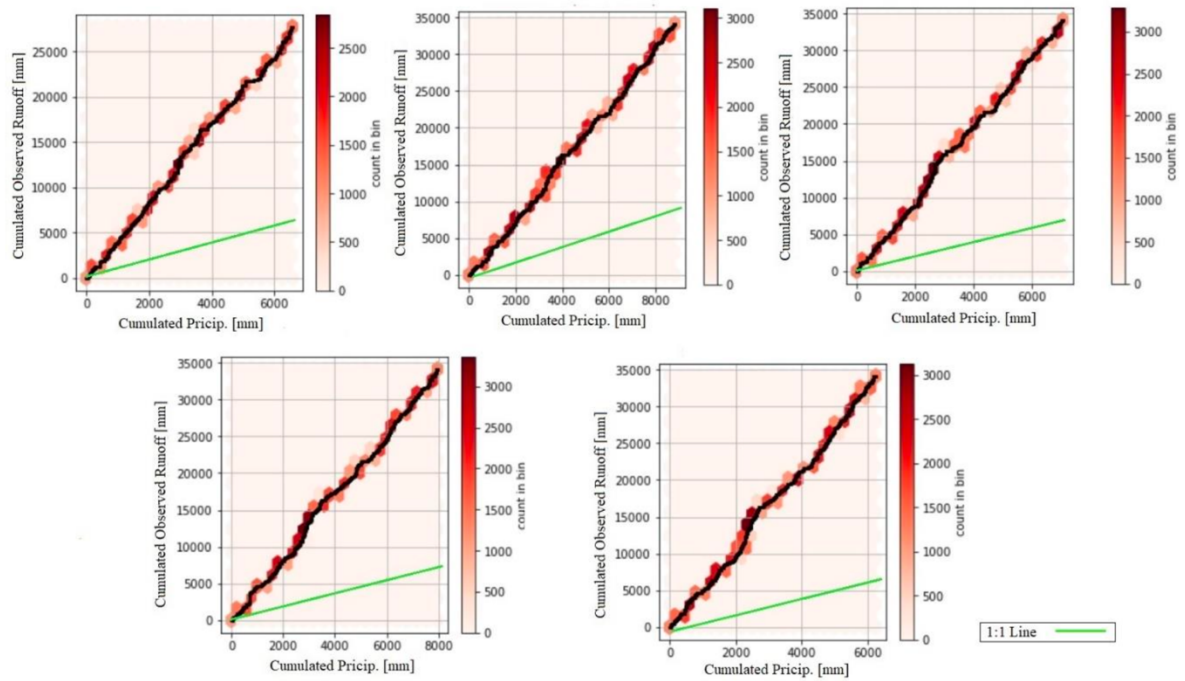

**Figure S1.** Cumulative CSA observed discharge against cumulative precipitation recorded at different stations located inside and outside of CSA.

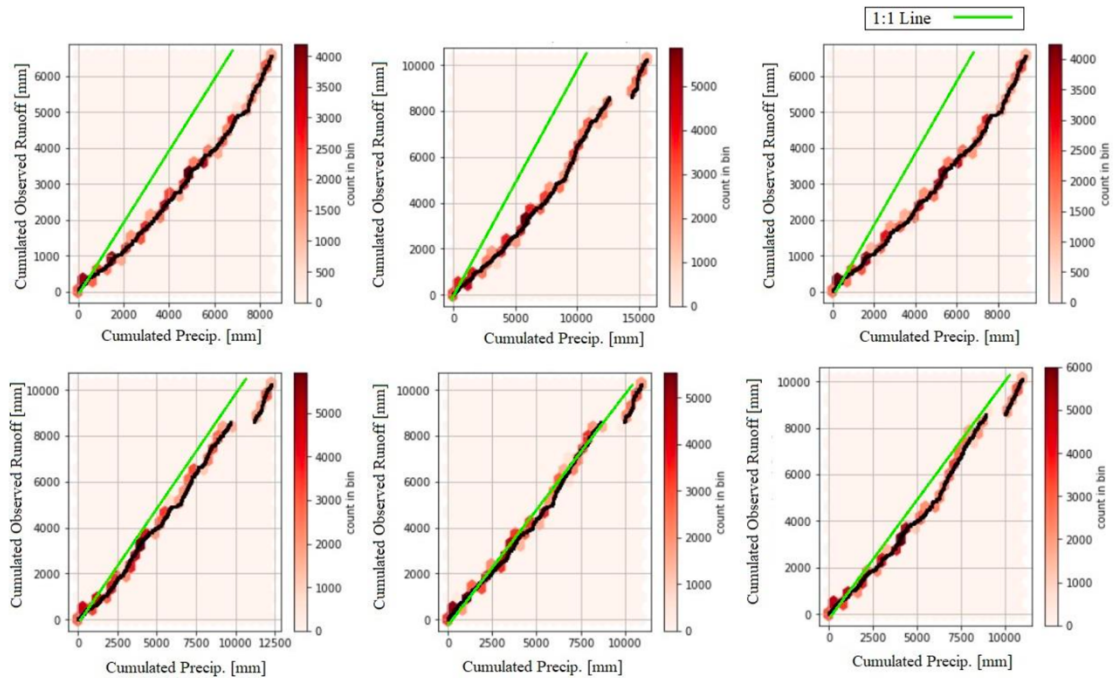

**Figure S2.** Cumulative Visso observed discharge against cumulative precipitation recorded at different stations located inside and outside of the basin.

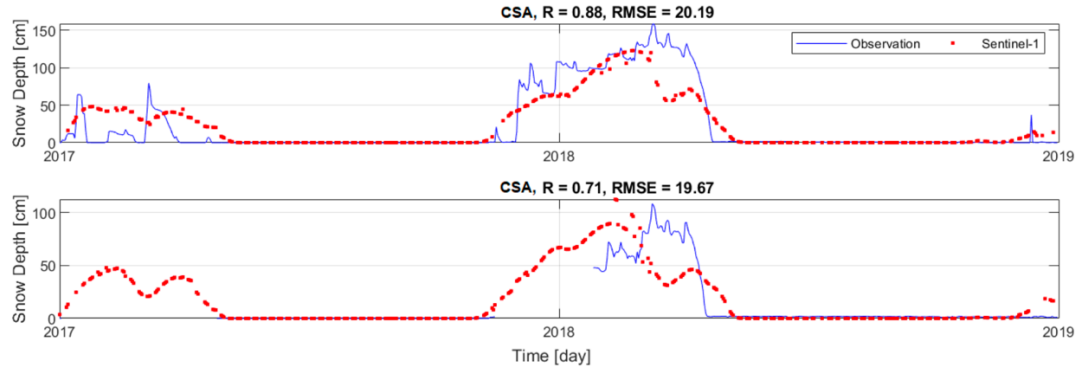

**Figure S3.** A comparison between Sentinel-1 and in-situ snow depth related to different stations located at CSA. The performance of Sentinel-1 is relatively good.

**Table S1.** Calibrated model parameters for CSA, Ussita, and Visso

| Parameters              | Description                                                     | CSA     | Ussita  | Visso    |
|-------------------------|-----------------------------------------------------------------|---------|---------|----------|
| $\alpha_r$              | Adjustment coefficient for the rainfall measurements errors [-] | 0.99    | 1       | 0.76     |
| $\alpha_s$              | Adjustment coefficient for the snow measurements errors [-]     | 0.91    | 1       | 0.77     |
| Melting Temperature     | Melting temperature [°C]                                        | 1.07    | 0.21    | -0.98    |
| Combined Melting Factor | Melting factor [mm/°C/day]                                      | 0.23    | 1.50    | 2.23     |
| Freezing Factor         | Freezing factor [mm/°C/day]                                     | 1.35    | 0.47    | 0.19     |
| Radiation Factor        | Coefficient for the computation of the maximum liquid water [-] | 6.77E-4 | 4.18E-4 | 9.32E-4  |
| $\alpha_l$              | Coefficient for the computation of the maximum liquid water [-] | 1.19    | 0.60    | 0.98     |
| $k_c$                   | Coefficient canopy out [-]                                      | 2.37    | 0.67    | 1.62     |
| $p$                     | Partitioning coefficient free throughfall [-]                   | 0.89    | 0.62    | 0.12     |
| $s_{rootZoneMax}$       | Maximum value of the rootzone water storage [mm]                | 641.58  | 1058.11 | 7648.84  |
| $g$                     | Maximum percolation rate [-]                                    | 5.68    | 2.61    | 4.92     |
| $h$                     | Exponential of non-linear reservoir model [-]                   | 0.12    | 2.05    | 1.66     |
| $pB_{soil}$             | Degree of spatial variability of the soil moisture capacity [-] | 6.68    | 9.17    | 13.36    |
| $c$                     | Coefficient of the non-linear reservoir model [-]               | 10.16   | 8.24    | 8.27     |
| $d$                     | Exponent of the non-linear reservoir model [-]                  | 2.8     | 3.92    | 4.01     |
| $s_{RunoffMax}$         | Maximum runoff storage [mm]                                     | 62.02   | 27.62   | 94.88    |
| $e$                     | Coefficient of the non-linear reservoir model [-]               | 0.44    | 11.21   | 11.69    |
| $f$                     | Exponent of the non-linear reservoir model [-]                  | 1.71    | 8.71    | 10.94    |
| $s_{GroundWaterMax}$    | Maximum groundwater storage [mm]                                | 2824    | 3027.30 | 10794.25 |
