# Supplementary material for: On understanding mountainous carbonate basins of the Mediterranean using parsimonious modeling solutions
Source: Copernicus journal article supplement (doi:10.5194/hess-27-4485-2023), 2023-12-20
Supplement: Supplementary file 2 [file hess-27-4485-2023-supplement.zip]

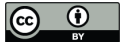

## *Supplement of*

# **On understanding mountainous carbonate basins of the Mediterranean using parsimonious modeling solutions**

**Shima Azimi et al.**

*Correspondence to:* Riccardo Rigon ([riccardo.rigon@unitn.it](mailto:riccardo.rigon@unitn.it))

- [hess-27-4485-2023-supplement-title-page.pdf](#)
- [ECP\\_uncertainty\\_analysis.ipynb](#)
- [Supplemental\\_material\\_13\\_12\\_2023.pdf](#)
- [observation.csv](#)
- [simulation.csv](#)

The copyright of individual parts of the supplement might differ from the article licence.
